# Supplementary material
Source: HighWire-hosted journal article supplement (https://www.cfp.ca/highwire/filestream/43645/field_highwire_adjunct_files/0/Supplementary_Data_Collection_Information.pdf)
Supplement: Supplementary_Data_Collection_Information.pdf [file Supplementary_Data_Collection_Information.pdf]

## Appendix: Detailed information on data collection

| Variable Name                                        | Means of collection                    | Format collected  | Format used in the analysis                                     |
|------------------------------------------------------|----------------------------------------|-------------------|-----------------------------------------------------------------|
| Age                                                  | Administrative database                | Age in years      | Categorical (<85, ≥85)                                          |
| Female gender                                        | Administrative database                | Categorical       | Categorical (Female vs. Male)                                   |
| Living arrangement                                   | Interview questionnaire                | Categorical       | Categorical (Lives alone, with adults, in autonomous residence) |
| Health status                                        | Interview questionnaire                | Categorical       | Ordinal (Not-Good to Excellent)                                 |
| Charlson Co-morbidity Score                          | Chart review                           | Continuous score  | Continuous score, truncated up to 3 or more                     |
| Identification of Seniors At Risk score              | Chart review + Interview questionnaire | Continuous score  | Categorical (<2 or ≥2)                                          |
| Barthel Index                                        | Interview questionnaire                | Continuous score  | Categorical (≤80, 80-90, ≥90)                                   |
| Number of medications                                | Interview questionnaire                | Continuous number | Continuous number, truncated up to 16                           |
| Previous emergency department visits within 6 months | Interview questionnaire                | Categorical       | Categorical (Yes/No)                                            |
| Previous hospital admissions within 6 months         | Interview questionnaire                | Categorical       | Categorical (Yes/No)                                            |
| Receiving local community services                   | Interview questionnaire                | Categorical       | Categorical (Yes/No)                                            |
| Receiving local community nurse visits               | Interview questionnaire                | Categorical       | Categorical (Yes/No)                                            |
| Receiving local community medical services           | Interview questionnaire                | Categorical       | Categorical (Yes/No)                                            |
| Followed by family physician                         | Interview questionnaire                | Categorical       | Categorical (Yes/No)                                            |

**Appendix: Detailed information on data collection (continued)**

| <b>Variable Name</b>                                                                | <b>Means of collection</b> | <b>Format collected</b> | <b>Format used in the analysis</b>       |
|-------------------------------------------------------------------------------------|----------------------------|-------------------------|------------------------------------------|
| Followed by specialist(s)                                                           | Interview questionnaire    | Categorical             | Categorical (Yes/No)                     |
| Contacted health care provider before ED visit                                      | Interview questionnaire    | Categorical             | Categorical (Yes/No)                     |
| Contacted family doctor before ED visit                                             | Interview questionnaire    | Categorical             | Categorical (Yes/No)                     |
| Difficulty with seeing family physician within 2 days for an urgent medical problem | Interview questionnaire    | Categorical             | Categorical (Difficult vs. Easy)         |
| Difficulty in getting an appointment for a new problem                              | Interview questionnaire    | Categorical             | Categorical (Difficult vs. Easy)         |
| Difficulty in speaking with family physician by telephone                           | Interview questionnaire    | Categorical             | Categorical (Difficult vs. Easy)         |
| Ambulance arrival                                                                   | Administrative database    | Categorical             | Categorical (Yes/No)                     |
| Triage level                                                                        | Administrative database    | Categorical             | Ordinal (level 1 to level 5)             |
| Top Diagnosis                                                                       | Administrative database    | Categorical             | Categorical (Top several vs. other)      |
| Admitted at the index visit                                                         | Administrative database    | Categorical             | Categorical (Yes/No)                     |
| Referred to primary care after discharge                                            | Chart review               | Categorical             | Categorical (Yes/No)                     |
| Referred to outpatient clinic after discharge                                       | Chart review               | Categorical             | Categorical (Yes/No)                     |
| Index Visit occurred on weekend                                                     | Administrative database    | Categorical             | Categorical (Yes/No)                     |
| Index Visit Shifts                                                                  | Administrative database    | Categorical             | Categorical (Day, Evening, Night Shifts) |
| Length of stay in ED                                                                | Administrative database    | Length in hours         | Continuous                               |
| Length of stay in hospital ward                                                     | Administrative database    | Length in days          | Continuous                               |
| Return visits within 3 months                                                       | Interview questionnaire    | Continuous number       | Categorical (Yes/No) and as Count        |

**Table: Comparison between completed study patients and patients withdrawn after being enrolled, excluding death**

| <b>Variable Name</b>                 | <b>Patients in analysis<br/>N=1998</b> | <b>Patients withdrawn<br/>after enrollment<br/>(Excluding death)<br/>N=126</b> |
|--------------------------------------|----------------------------------------|--------------------------------------------------------------------------------|
| Age $\geq$ 85 years                  | 33.7%                                  | 36.5%                                                                          |
| Female                               | 61.3%                                  | 63.5%                                                                          |
| Living arrangement                   |                                        |                                                                                |
| -- Lives alone                       | 34.2%                                  | 35.7%                                                                          |
| -- Lives with adults                 | 46.4%                                  | 34.9%                                                                          |
| -- Lives in autonomous residence     | 19.4%                                  | 29.4%                                                                          |
| Health status (=Excellent)           | 13.0%                                  | 12.7%                                                                          |
| Charlson Co-morbidity Score $\geq$ 2 | 51.1%                                  | 53.2%                                                                          |
| Triage level ( $\leq$ 3)             | 75.9%                                  | 73.0%                                                                          |
| Ambulance arrival                    | 55.4%                                  | 67.5%                                                                          |
| Top Diagnosis                        |                                        |                                                                                |
| -- Chest Pain                        | 7.2%                                   | 4.0%                                                                           |
| -- Pneumonia                         | 4.4%                                   | 4.8%                                                                           |
| -- Congested heart failure           | 3.1%                                   | 2.4%                                                                           |
| -- General weakness                  | 2.7%                                   | 4.8%                                                                           |
